# Supplementary material for: Preliminary Study of the Antimicrobial, Anticoagulant, Antioxidant, Cytotoxic, and Anti-Inflammatory Activity of Five Selected Plants with Therapeutic Application in Dentistry
Source: MDPI journal article supplement (doi:10.3390/ijerph19137927), 2022-06-28
Supplement: s1 [file s1]

\*Acto bucodental: Procedimiento, médico o quirúrgico con fines diagnósticos, terapéuticos, rehabilitatorios, paliativos o de investigación. Debe actualizar Consentimiento cada vez que modifique el plan de tratamiento

Eventos que requieren consentimiento informado: Procedimientos que requieren anestesia general o regional, Investigación clínica en seres humanos, Cualquier procedimiento que extraña mutilación. Cada acto o cambio de plan de tratamiento (procedimiento/acto) genera un Consentimiento Informado.

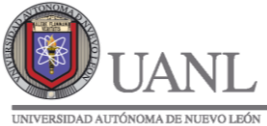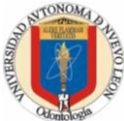

CLINICA / MODULO: \_\_\_\_\_

CONSENTIMIENTO INFORMADO

Yo \_\_\_\_\_ con fecha de nacimiento \_\_\_\_ de \_\_\_\_\_ de \_\_\_\_\_ con folio de expediente \_\_\_\_\_ manifiesto que el Doctor(a) y/o estudiante de Odontología (o especialidad del área Odontológica) \_\_\_\_\_ me ha informado que es recomendable se me realice el siguiente **acto bucodental\***: \_\_\_\_\_

\_\_\_\_\_ y que será atendido por el Doctor(a) y/o estudiante de Odontología (o especialidad del área Odontológica) \_\_\_\_\_

La(s) **alternativa(s) de tratamiento** es (son) la(s) siguiente(s): \_\_\_\_\_

**He decidido realizarme el acto bucodental** \_\_\_\_\_ de las opciones mencionadas anteriormente puesto que mis **motivos de elección** son: \_\_\_\_\_

a pesar que se me han explicado *riesgos y beneficios* del procedimiento que acepto se realice y de las alternativas mencionadas a continuación

Dado el(los) siguiente(s) **diagnostico(s)**: \_\_\_\_\_

Con **pronóstico**: Bueno: ☐ Malo: ☐ Reservado: ☐

**Categorizándolo como un acto odontológico**: Urgente: ☐ De riesgo: ☐ No urgente: ☐  
Otro (especificar): ☐

Se me informó que dadas mis **condiciones de salud general** se pueden presentar los siguientes riesgos antes, durante y/o después de realizado el acto bucodental: \_\_\_\_\_

De acuerdo a mi estado de Salud general se me considera como un paciente con **condiciones pre-anestésicas tipo** ☐ según los lineamientos señalados en la *NOM006 SSA3 2011 Para la práctica de anestesiología*.

Los **beneficios** de realizarme el acto odontológico señalado en este documento son: \_\_\_\_\_

**Riesgo(s)** del acto(s) sugerido(s): \_\_\_\_\_

El **procedimiento consiste en (descripción breve)**: \_\_\_\_\_

**El acto odontológico generalmente se realiza con anestesia local en una o más citas de larga duración dependiendo de la situación bucodental, se utilizan materiales dentales con diversos componentes químicos**, lo que puede tener complicaciones con la administración o contacto directo/continuado, como: alergia leve (edema, prurito, rash cutáneo, edema angioneurótico, irritación) hasta grave como shock anafiláctico (que amerite intervención de urgencia), taquicardia, parestesia temporal de la región infiltrada (por no más de 4 horas, por lo que se recomienda no hablar o comer en este lapso), limitación de apertura bucal, dolor en el sitio de la punción, hematomas, aftas, mareo.

**Posibles Complicaciones o molestias del acto descrito:**

Todas las mencionadas en el párrafo anterior (producidas por la aplicación de anestesia y química de los materiales dentales)  
Limitación de apertura bucal o dislocación del maxilar inferior por la apertura bucal prolongada.

NOM 006 SSA3 2011 Para la Práctica de Anestesiología.  
9. Lineamientos para el cuidado pre-anestésico  
9.2 [enlista VII tipos] Preferir pacientes tipo I y II, Tipo III casos excepcionales IV al VI nivel hospitalario  
I) Paciente sano que requiere cirugía sin antecedente o patología agregada  
II) Paciente que cursa con alguna enfermedad sistémica, pero controlada  
III) Paciente que cursa con alguna enfermedad sistémica no controlada  
IV) Paciente con enfermedad sistémica incapacitante  
V) Paciente, se opere o no, tiene riesgo inminente de fallecer (24 hrs posteriores a valoración)  
VI) Paciente con muerte encefálica, órganos a extirparse para trasplante  
N.A: No aplica

En ocasiones se pueden llegar a necesitar actos adicionales que pudieran significar un costo y riesgos adicionales a los descritos en este documento, mismos que de suscitarse se me harán saber.

El tratamiento propuesto tiene el(los) siguiente(s) **efecto(s) secundario(s)**: alergia (inmediata, edema angioneurótico, dermatitis, rash cutáneo), irritación de las mucosas (por alergia o quemadura leve a los componentes de los materiales dentales), sensibilidad posoperatoria, dolor posoperatorio,

\_\_\_\_\_

\_\_\_\_\_

\_\_\_\_\_

Al terminar el acto odontológico motivo de este Consentimiento se me ha comentado que es necesario con el fin de prolongar los beneficios del acto realizado realice las siguientes **recomendaciones posteriores al acto** descrito en este documento:

\_\_\_\_\_

\_\_\_\_\_

\_\_\_\_\_

**DECLARO** que he COMPRENDIDO Y SE ME HAN ACLARADO TODAS MIS DUDAS de todo lo escrito en este documento y se me ha comentado que puedo en todo momento aclarar las dudas que surjan antes, durante y después del tratamiento. Estoy enterado(a) que es mi derecho, en todo momento **confirmar o revocar** la continuidad del acto odontológico que hoy asiento.

Reconozco que de no acudir a las citas en las fechas indicadas, el plan de tratamiento y costos puede modificarse ya que algunos padecimientos bucodentales pueden cambiar (avanzan) constantemente con el paso del tiempo.

Entiendo que la Facultad de Odontología de la U.A.N.L es una institución docente, asistencial, y de investigación. Por lo que de acuerdo a la **NOM 004 SSA3 2012 Del expediente clínico** comprendo que todos los estudios de imagen (Radiografías, fotografías, entre otros), laboratorio y gabinete, modelos de estudio, recibos de pago (a excepción del comprobante que me corresponde) necesarios para la atención permanecerán resguardados en el expediente clínico de esta institución, así como la Historia Clínica (que contiene: Diagnóstico, Pronóstico, Plan de Tratamiento, Notas de Evolución y Referencias) y que el personal que labora en este Centro Educativo está comprometido en respetar **mi derecho de titularidad y confidencialidad\*** por lo que **la autenticidad y actualización de los datos proporcionados es responsabilidad mía como de quien la recaba**.

Sin embargo como institución de educación e investigación, comprendo que la información recopilada en la Historia Clínica y anexos pudiera ser utilizados con fines académicos y de divulgación\*; Por lo cual manifiesto mi autorización de presentar salvaguardando mi identidad (*especificar*), la información y/o imágenes divulgadas en los diversos foros (académico-científicos y/o a la población general) **Autorizo la divulgación de información:**

SI

NO

**Pueden mostrar:** Rostro completo: ☐      Mostrar rostro con franja en los ojos: ☐      Tercio inferior de la cara: ☐

Solo el área de interés: ☐      Otro (especificar): ☐ \_\_\_\_\_

Observación realizada por el paciente para su autorización: \_\_\_\_\_

\_\_\_\_\_

**Nota:** Manifiesto que de ser necesario realizar un acto de urgencia o contingencia derivada del acto autorizado, consiento al personal para realizar la intervención, ya sea odontoestomatológica y/o de urgencia que amerite de Resucitación Cardiopulmonar o cualquiera necesario para mi estabilización y resguardo de mi vida e integridad general o la de algún órgano (dentario o tejido blando bucal). En caso de *revocar mi autorización u abandonar el tratamiento*, deberá expedirse un registro de **Egreso Voluntario** (incluirlá un resumen clínico) mismo que quedara asentado en la nota de evolución clínica.

\_\_\_\_\_ Nuevo León; a \_\_\_\_\_ de \_\_\_\_\_ 20\_\_

**Paciente/Padre, Tutor o familiar más cercano**  
Nombre completo y Firma de enterado y comprensión previa a la autorización de todo lo asentado en este documento  
**ID oficial con fotografía:** Elector\_\_ Licencia\_\_ Cartilla militar\_\_ Pasaporte\_\_ Otro: \_\_\_\_\_  
**FOLIO/NUMERO:** \_\_\_\_\_

**Estomatólogo Tratante**  
Nombre completo y Firma de haber informado y resuelto las dudas del motivo del Consentimiento Informado, previamente a la firma del asentamiento y acto odontológico.  
**Cedula Profesional/Matricula** \_\_\_\_\_

**Testigo 1**  
Nombre completo y Firma de enterado  
**ID oficial con fotografía:** Elector\_\_ Licencia\_\_ Cartilla militar\_\_ Pasaporte\_\_ Otro: \_\_\_\_\_  
**FOLIO/NUMERO:** \_\_\_\_\_

**Testigo 2**  
Nombre completo y Firma de enterado  
**ID oficial con fotografía:** Elector\_\_ Licencia\_\_ Cartilla militar\_\_ Pasaporte\_\_ Otro: \_\_\_\_\_  
**FOLIO/NUMERO:** \_\_\_\_\_
